# Supplementary figures and images for: SARS-CoV-2-Specific Immune Responses in Vaccination and Infection during the Pandemic in 2020–2022
Source: MDPI journal article supplement (doi:10.3390/v16030446), 2024-03-13

# Epidemic waves of SARS-CoV-2 infection in Japan

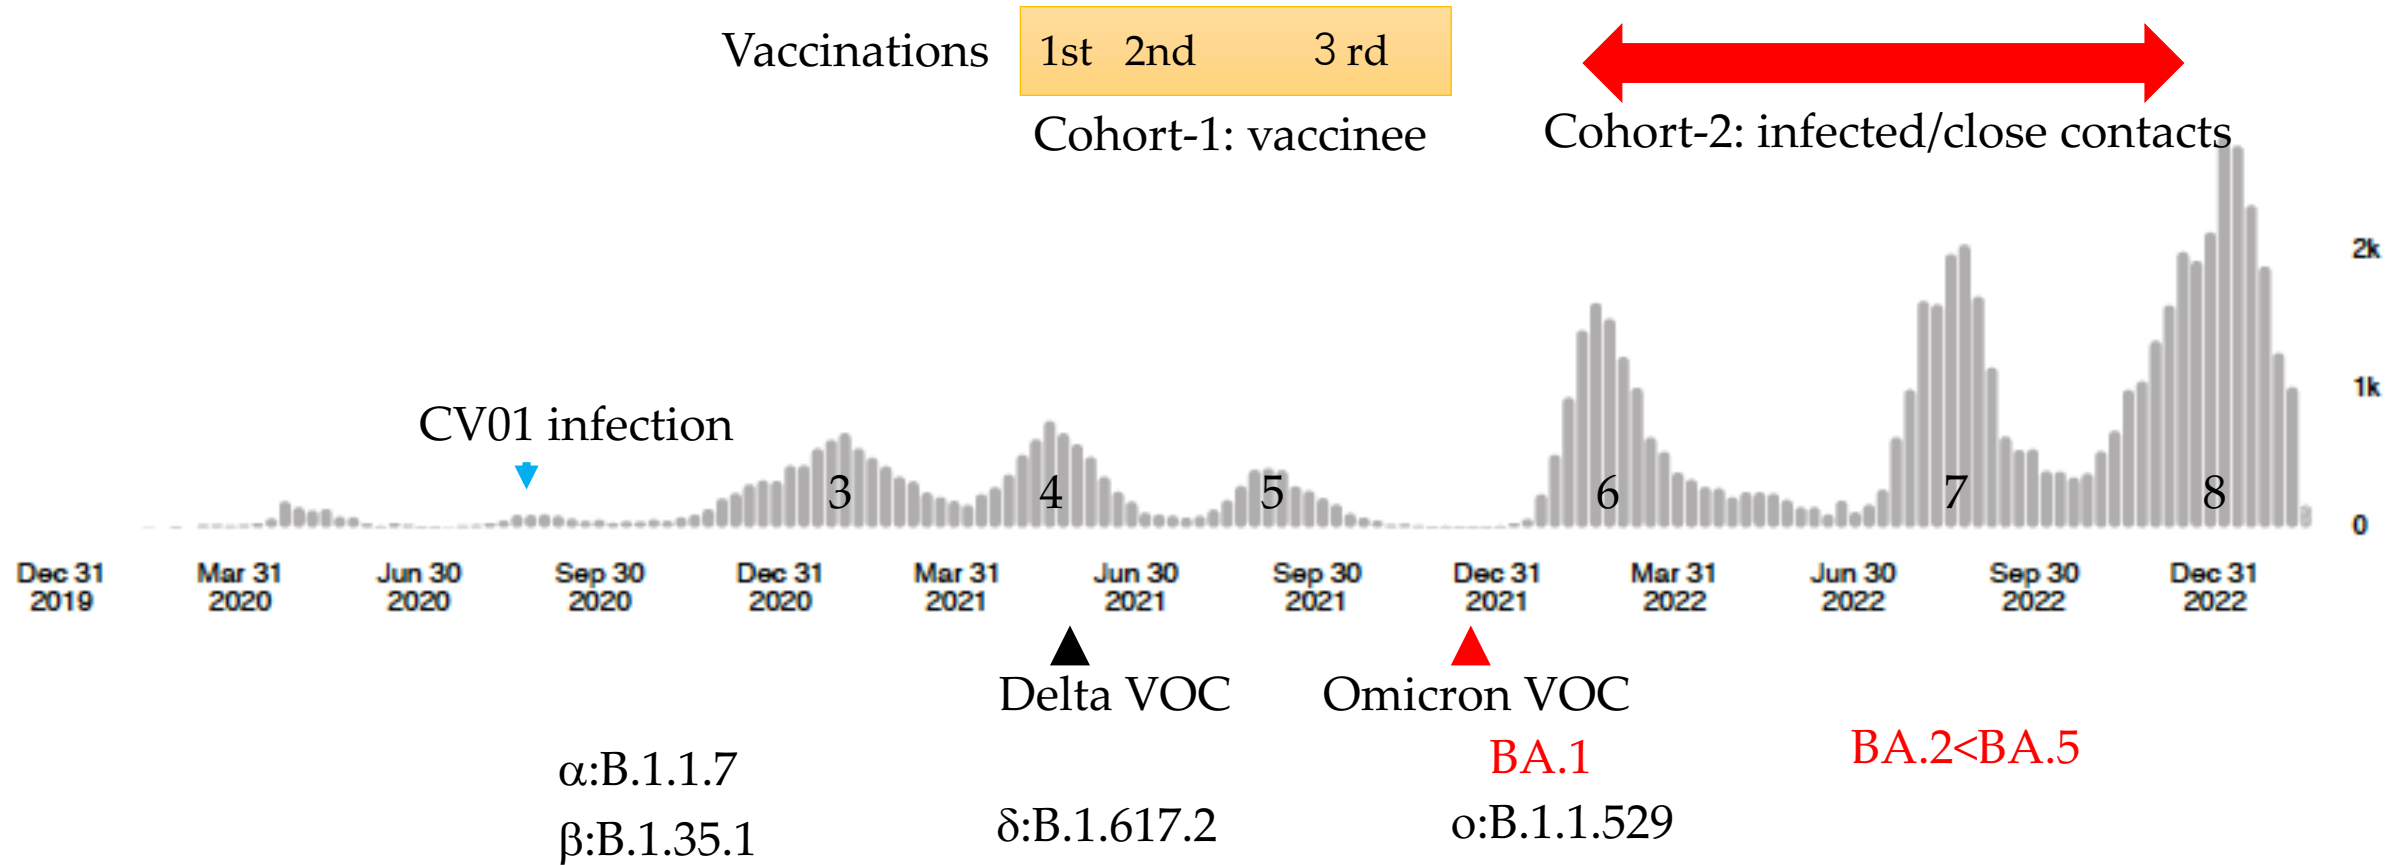

Supplement: s1 [file s1]
